# Supplementary material for: Allele-specific long-distance regulation dictates IL-32 isoform switching and mediates susceptibility to HIV-1
Source: PubMed Central journal article supplement — Sci Adv. 2018 Feb 21;4(2):e1701729. doi: 10.1126/sciadv.1701729 (PMC5833994; doi:10.1126/sciadv.1701729), 2018-02-21
Supplement: 1701729_SM.pdf [file 1701729_SM.pdf]

## Supplementary Materials for

### **Allele-specific long-distance regulation dictates IL-32 isoform switching and mediates susceptibility to HIV-1**

Robert-Jan Palstra, Elisa de Crignis, Michael D. Röling, Thomas van Staveren, Tsung Wai Kan, Wilfred van Ijcken, Yvonne M. Mueller, Peter D. Katsikis, Tokameh Mahmoudi

Published 21 February 2018, *Sci. Adv.* **4**, e1701729 (2018)  
DOI: 10.1126/sciadv.1701729

#### **This PDF file includes:**

- fig. S1. Characterization of the rs4349147 DHS and the rs4349147 KO clone.
- fig. S2. Characterization of the rs4349147 G/–, rs4349147 –/A, and –/A  $\Delta$ rs4349147 clones.
- fig. S3. HIV infectability and differential expression of IL-32 isoforms between WT, rs4349147 G/–, and rs4349147 –/A clonal Jurkat cell lines.
- fig. S4. Analysis of genes that are at least twofold differentially expressed in rs4349147 –/A compared to rs4349147 G/– and WT clonal Jurkat cell lines.
- fig. S5. Endogenous lentiviral overexpression of IL-32 isoforms in CD4<sup>+</sup> cells results in altered HIV susceptibility and proinflammatory cytokine expression.
- fig. S6. UCSC genome browser graphic of DNase I hypersensitivity (upper track, black, blue, purple) and mRNA sequencing (lower track, green) data obtained from the Human Epigenome Atlas.
- table S1. Overview of SNPs.
- table S2. List of differentially regulated genes.
- table S3. GO term analysis of –/A versus WT and G/– down-regulated genes.
- table S4. Cytokine secretion in Jurkat cells as measured by Proteome Profiler Human XL Cytokine Array kit.
- table S5. Cytokine secretion in CD4<sup>+</sup> T cells after stimulation and infection with HIV as measured by Proteome Profiler Human XL Cytokine Array kit.
- table S6. Primer sequences used.

# Supplementary Figure 1.

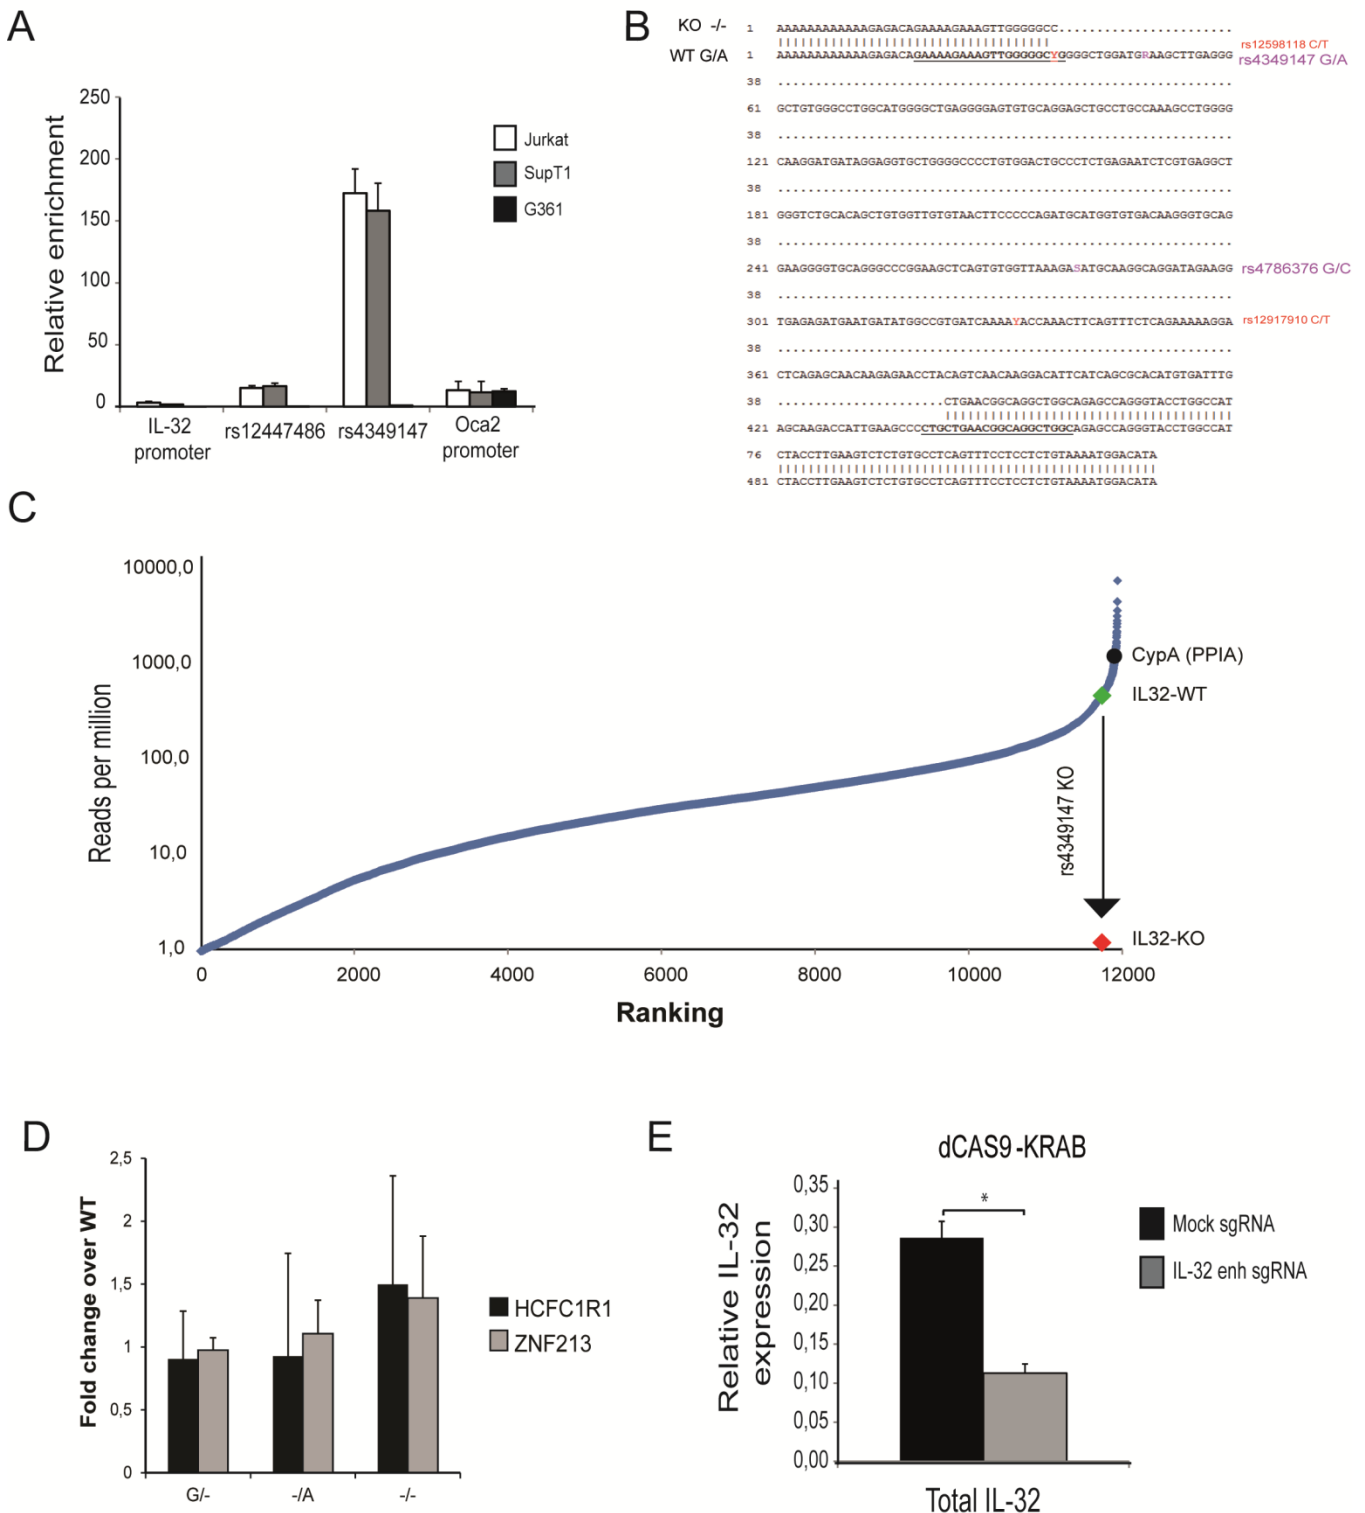

**fig. S1. Characterization of the rs4349147 DHS and the rs4349147 KO clone.** (A) FAIRE analysis of the region surrounding rs4349147 demonstrates significant increase in DNA accessibility indicating this region is depleted of histones and accessible in the T cell derived cell lines Jurkat and SupT1 but not in the melanoma cell line G361. By comparison, control regions rs12447486 and the melanocyte specific Oca2 promoter are less accessible as shown in the FAIRE analysis. (B) Sequencing of PCR

amplicon 1 (see figure 1B) spanning the rs4349147 DHS KO(-/-) line depicts the region deleted using Crispr/CAS9. Top sequence is obtained from the IL-32 rs4349147 DHS KO(-/-) cells; bottom sequence is obtained from the WT(G/A) cells. Sequence of the sgRNA's are indicated by boldface font and underlined. Position of variants is indicated. **(C)** Reads per million of all genes expressed above 1 read per million are ranked in ascending order. In WT(G/A) Jurkat cells IL-32 expression is among the top 5% of highly expressed genes (green diamond) Upon deletion of the rs4349147 regulatory element IL-32 expression drops to the lowest 2% of expressed genes (red diamond). The CypA gene is indicated as reference (black dot). **(D)** Real-time pcr confirmation of invariable expression of surrounding genes. **(E)** Targeting of a dCAS9-KRAB domain fusion to the rs4349147 region in wild type Jurkat cells results in reduced IL-32 expression.



# Supplementary Figure 3.

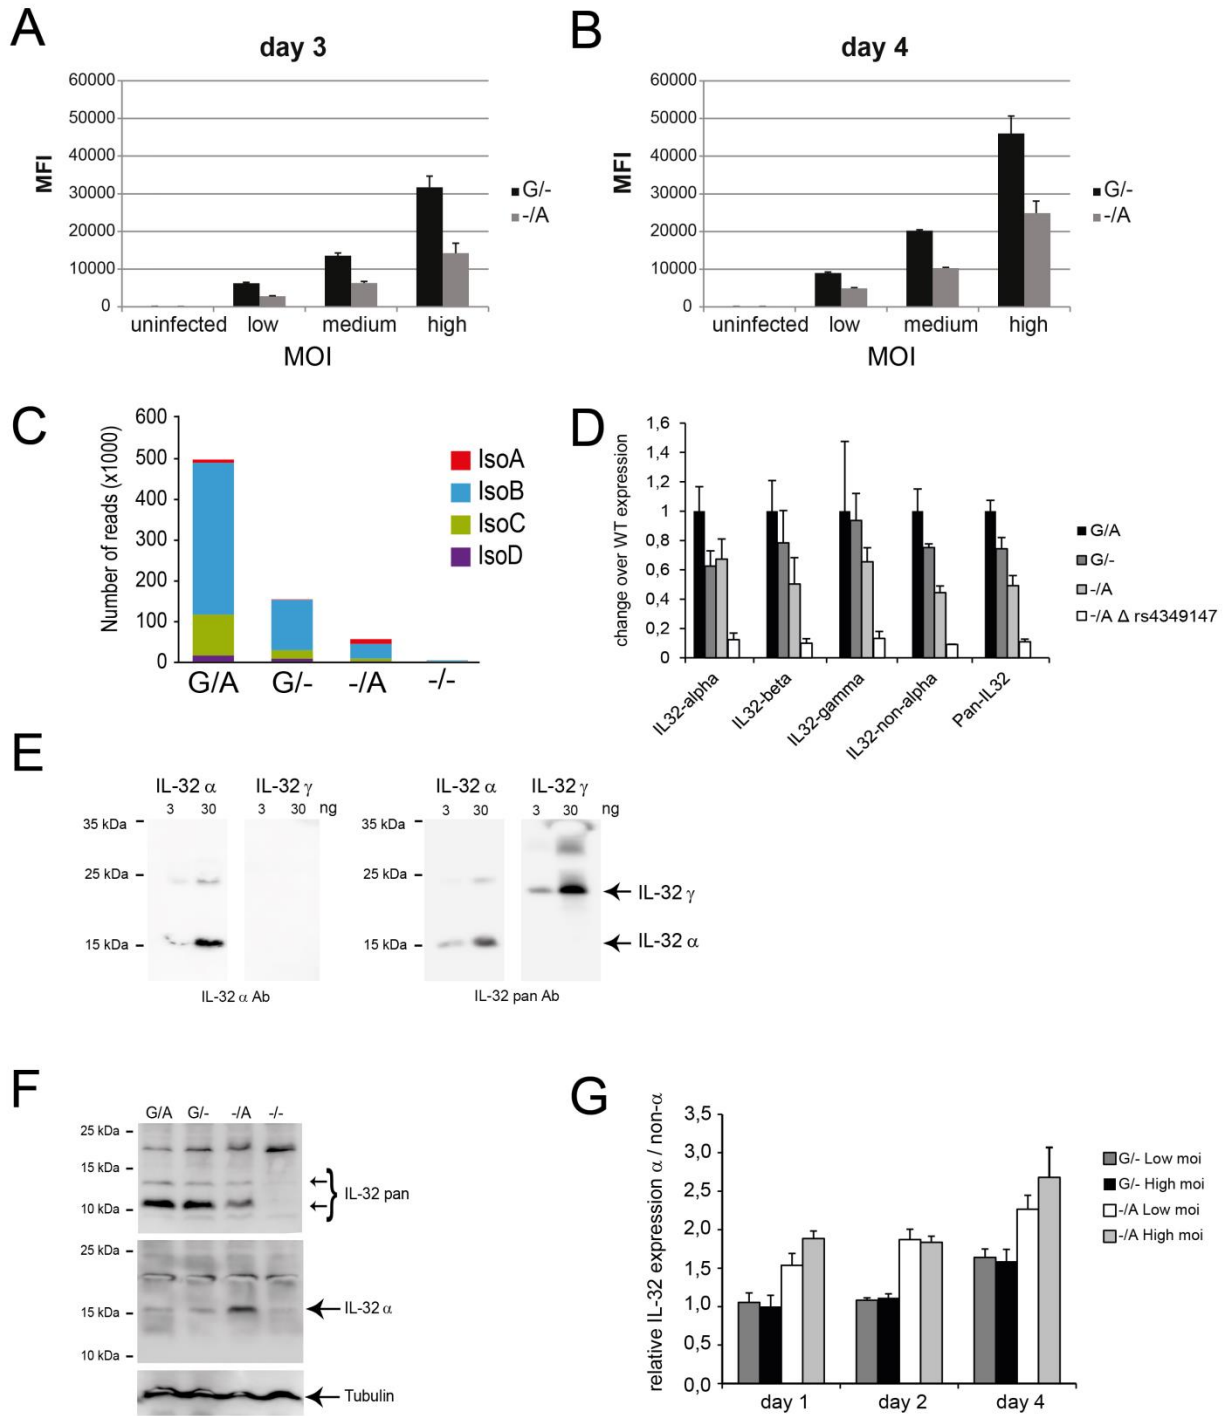

**fig. S3. HIV infectability and differential expression of IL-32 isoforms between WT, rs4349147 G/-, and rs4349147 -/A clonal Jurkat cell lines. (A, B)** Difference in sensitivity to HIV infection between the rs4349147 -/A and rs4349147 G/- Jurkat cells is independent of MOI and time frame. (A) depicts MFI three days after infection using different MOI and (B) depicts MFI four days after infection using different MOI. Low MOI corresponds to ~20% GFP positive cells, medium MOI to ~50% GFP positive cells and High to ~80% GFP positive cells. (C) IL-32 isoform A expression is relatively elevated in

rs4349147 -/A cells as compared to rs4349147 G/- or WT(G/A) cells. Bar charts show the number of reads for each isoform in the high throughput RNA sequencing analysis **(D)** Relative expression of the IL-32 $\alpha$ , IL-32 $\beta$  and IL-32 $\gamma$  in WT,rs4349147 -/A , rs4349147 G/- and the -/A  $\Delta$ rs4349147 Jurkat cells. The primer pair for IL-32 $\beta$  only recognizes the “short” Var3 isoform originating from the EPD IL32\_1 promoter. **(E)** Determination of specificity of commercial anti-pan IL-32 and anti-IL-32 $\alpha$ -specific antibodies as indicated. Western blot analysis of 3 and 30 ng each of recombinant IL-32 $\alpha$  and IL-32 $\gamma$  protein is shown. **(F)** Western blot analysis using a pan-IL-32 antibody and an antibody specific to IL-32 $\alpha$  in the rs4349147 G/A, G/-, -/A and -/- Jurkat clones. **(G)** The increased ratio of IL-32 $\alpha$  over non- $\alpha$  IL-32 isoforms does not change after infection and is independent of the MOI of infection. Low MOI corresponds to ~20% GFP positive cells and High to ~80% GFP positive cells.

# Supplementary Figure 4.

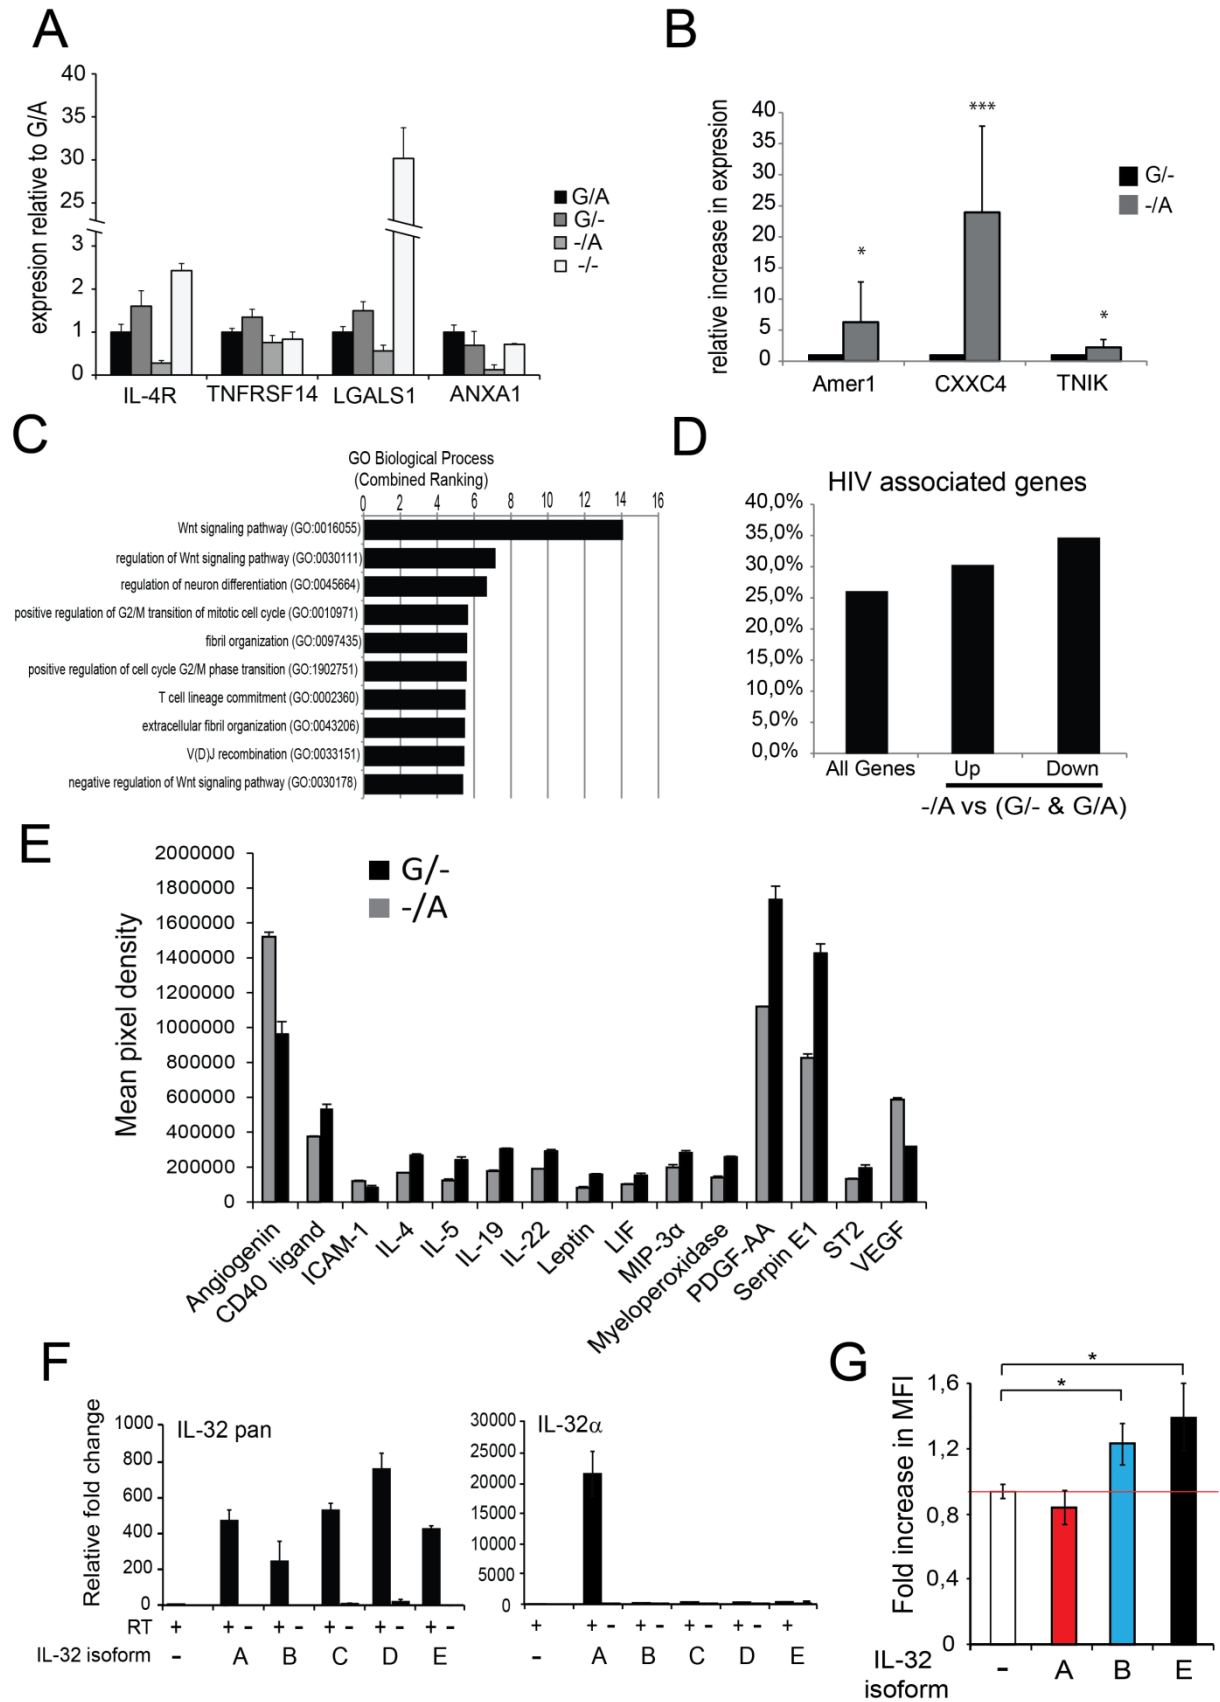

**fig. S4. Analysis of genes that are at least twofold differentially expressed in rs4349147 -/A compared to rs4349147 G/- and WT clonal Jurkat cell lines. (A) Expression of a selection of genes downregulated between rs4349147 -/A and rs4349147 G/- as well as WT(G/A) clonal Jurkat cell lines**

IL-4R, TNFRSF14, LGALS1, and ANXA1 in WT, rs4349147 -/A, rs4349147 G/- and KO Jurkat cells. **(B)** RT-PCR confirmation of a selection of genes upregulated between rs4349147 -/A and rs4349147 G/- as well as WT clonal Jurkat cell lines. **(C)** GO biological process analysis of genes upregulated between rs4349147 -/A and rs4349147 G/- as well as WT clonal Jurkat cell lines. A significant enrichment for factors involved in Wnt signaling and a slight enrichment for factors involved in neuron differentiation is found. **(D)** HIV associated genes, here defined as previously shown to interact with HIV either genetically or via protein-protein interaction (from HIV-1 Human Interaction Database; [www.ncbi.nlm.nih.gov/genome/viruses/retroviruses/hiv-1/interactions/](http://www.ncbi.nlm.nih.gov/genome/viruses/retroviruses/hiv-1/interactions/)) are overrepresented in the downregulated genes when compared to all genes (> 1rpm in Jurkats) and upregulated genes. **(E)** Mean pixel identity as measured by Proteome Profiler Human XL Cytokine Array Kit (R&D systems) in supernatant of rs4349147 -/A Jurkat cells and rs4349147 G/- Jurkat cells. **(F)** RT-PCR confirmation of exogenous expression of distinct IL-32 isoforms in rs4349147 enhancer KO Jurkat cells following nucleofection. Left panel shows IL-32 mRNA expression using PCR primers that detect all isoforms of IL-32. Right panel demonstrates mRNA expression of the IL-32 $\alpha$  isoform using PCR primers that specifically amplify the IL-32 $\alpha$  transcript. **(G)** Levels of infection, measured as fold increase in the MFI, following exogenous expression of IL-32 isoforms A, B, and E in WT Jurkat cells. Color coding is as for Fig. 3h.



# Supplementary Figure 5.

A

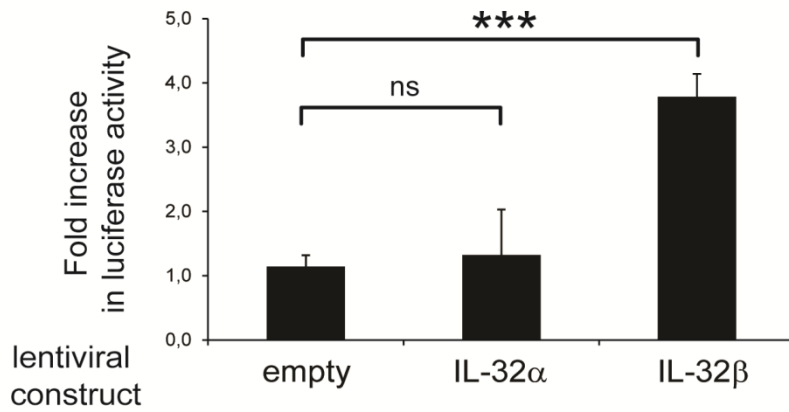

B

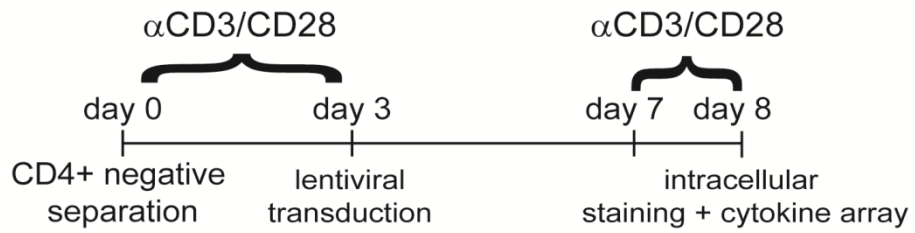

C

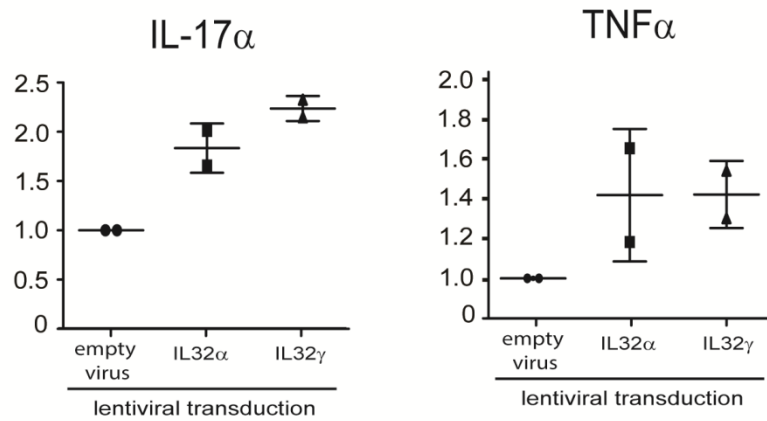

D

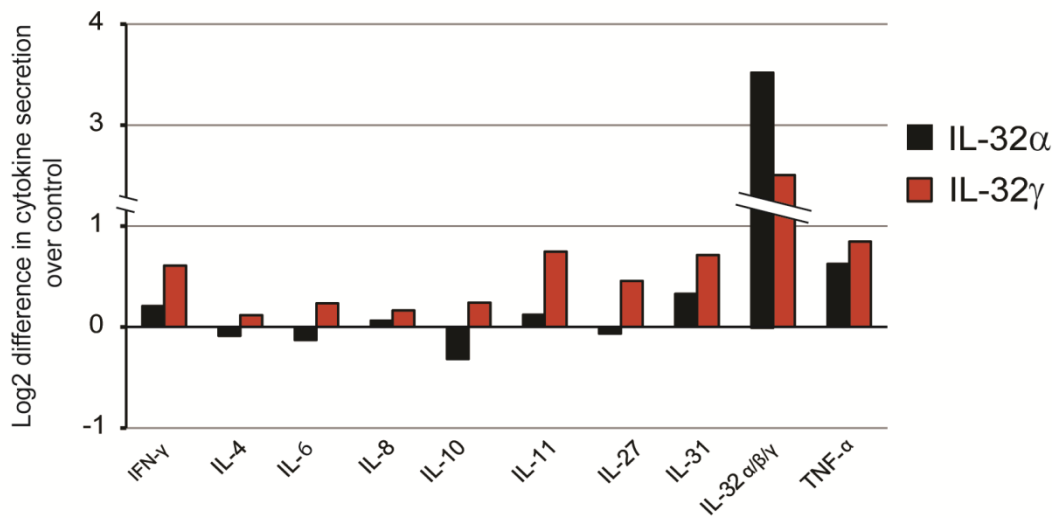

**fig. S5. Endogenous lentiviral overexpression of IL-32 isoforms in CD4<sup>+</sup> cells results in altered HIV susceptibility and proinflammatory cytokine expression.** (A) Exogenous lentiviral overexpression of IL-32 $\beta$  results in an increase in HIV infection as compared to CD4<sup>+</sup> T cells overexpressing IL-32 $\alpha$  or control cells infected with an empty lentiviral construct. (B) CD4<sup>+</sup> T cells isolated from two healthy donors were stimulated with CD3-CD28 coated beads and infected with a control lentiviral vector or a lentiviral vector expressing IL-32 $\alpha$  or IL-32 $\gamma$ . After 4 days the cells were re-stimulated for 24h and cytokine levels were determined by intracellular staining or measured using the Proteome Profiler Human XL Cytokine Array Kit (R&D systems) (C) Frequency of IFN $\gamma$  or TNF $\alpha$ -producing live (Annexin V-negative) purified CD4<sup>+</sup> T cells are shown from two different donors. Percentage indicate cytokine positive populations. (D) Cytokine secretion as measured by Proteome Profiler Human XL Cytokine Array Kit (R&D systems) demonstrates increased secretion of pro-inflammatory cytokines in the supernatant of CD4<sup>+</sup>T cells exogenously overexpressing IL-32 $\gamma$  as compared to CD4<sup>+</sup> T cells that overexpress IL-32 $\alpha$ . Values depicted are log<sub>2</sub> fold increase of IL-32 $\alpha$  (black bars) or IL-32 $\gamma$  (red bars) overexpressing cells over control cells. Note that robust overexpression of IL-32 in IL32 $\alpha$  and IL-32 $\gamma$  lentiviral infected CD4<sup>+</sup> cells is evident.

## Supplementary Figure 6.

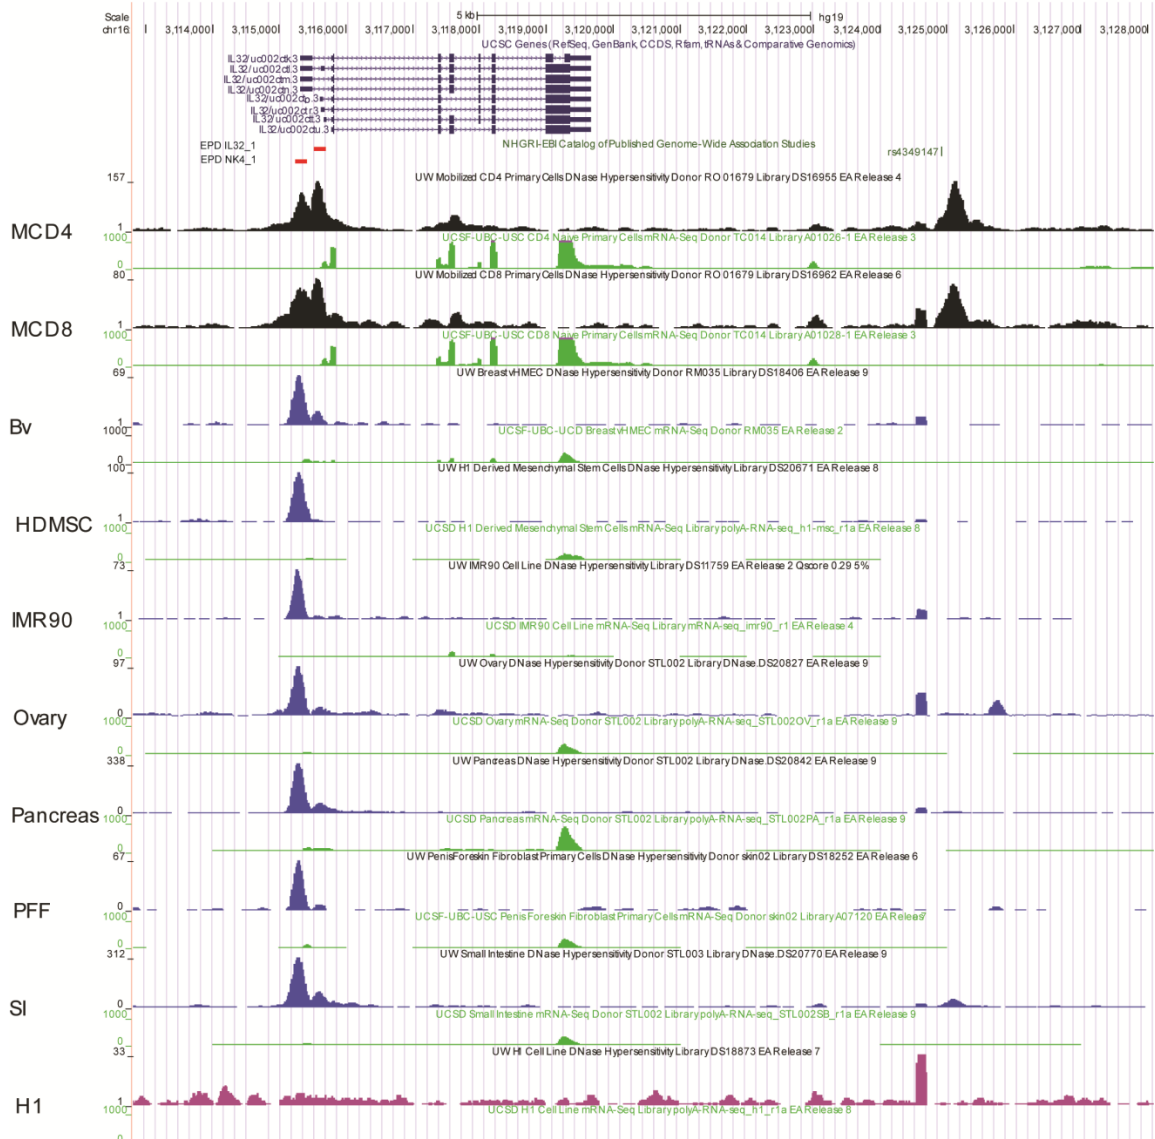

**fig. S6. UCSC genome browser graphic of DNase I hypersensitivity (upper track, black, blue, purple) and mRNA sequencing (lower track, green) data obtained from the Human Epigenome Atlas.** In T-cells, which express high levels of IL-32 (green tracks), a DNaseI HS peak (black tracks) is present at the location of rs4349147 and a double DNaseI HS peak is present at the IL-32 promoter region indicating the presence of two separate promoters for IL-32. In cell types that lack a DNaseI HS peak at the location of rs4349147 (blue tracks) but still express low levels of IL-32 (corresponding green tracks) a single DNaseI HS peak is present at the IL-32 promoter for the long IL-32 transcripts. In H1 human ES cells no DNaseI HS peaks are detected in the IL-32 locus and the IL-32 gene is not expressed. mRNA-seq tracks are delimited to 1000 to emphasize differences in expression levels, while DNaseI HS tracks are not delimited to emphasize IL-32 promoter region peaks. <http://www.genboree.org/epigenomeatlas/index.rhtml>. Promoters as defined by the Eukaryotic Promoter Database (EPD; <http://epd.vital-it.ch>) are indicated as red bars.

table S1. Overview of SNPs.

| SNP         | Celltype | Chromosome | start     | end       |
|-------------|----------|------------|-----------|-----------|
| rs2796163   | Th0;Th1  | chr1       | 234978473 | 234979377 |
| rs2802978   | Th1      | chr1       | 234978473 | 234979377 |
| rs62000984  | Th0;Th1  | chr6       | 26017665  | 26018290  |
| rs41266783  | Th0;Th1  | chr6       | 26031942  | 26032652  |
| rs2230654   | Th0;Th1  | chr6       | 26033518  | 26034104  |
| rs11751732  | Th0;Th1  | chr6       | 26043567  | 26044256  |
| rs9468842   | Th0;Th1  | chr6       | 30851403  | 30854679  |
| rs6901464   | Th0;Th1  | chr6       | 30851403  | 30854679  |
| rs1049622   | Th1      | chr6       | 30858647  | 30859161  |
| rs1049628   | Th1      | chr6       | 30866998  | 30867470  |
| rs2074510   | Th0;Th1  | chr6       | 30875522  | 30876336  |
| rs1052693   | Th0;Th1  | chr6       | 30875522  | 30876336  |
| rs3828917   | Th0;Th1  | chr6       | 31465194  | 31466193  |
| rs3093661   | Th1      | chr6       | 31542110  | 31543783  |
| rs9368699   | Th0;Th1  | chr6       | 31802108  | 31803075  |
| rs8192583   | Th0;Th1  | chr6       | 32162969  | 32164095  |
| rs6990319   | Th0;Th1  | chr8       | 66862573  | 66863027  |
| rs11998618  | Th0      | chr8       | 66858410  | 66858738  |
| rs12447486  | Th0;Th1  | chr16      | 3121836   | 3123558   |
| rs4349147   | Th0;Th1  | chr16      | 3124834   | 3125437   |
| rs2015620   | Th0      | chr16      | 3123504   | 3123607   |
| GRCh37/hg19 | assembly |            |           |           |

table S2. List of differentially regulated genes.

| GENE            | WT (RPM)        | G/- (RPM)       | -/A (RPM)      | -/- (RPM)       |
|-----------------|-----------------|-----------------|----------------|-----------------|
| OR3A2           | 1,9237          | 1,4648          | 0,0000         | 0,2341          |
| RTP4            | 0,8630          | 1,2101          | 0,0000         | 0,8993          |
| CARNS1          | 0,9448          | 0,5732          | 0,0000         | 0,9532          |
| TNS3            | 0,8009          | 0,3821          | 0,0000         | 0,3086          |
| NIPSNAP3B       | 0,6478          | 0,3821          | 0,0000         | 0,7406          |
| LGR6            | 0,5721          | 0,3821          | 0,0000         | 0,2341          |
| GCSAML          | 0,7887          | 0,2548          | 0,0000         | 0,6926          |
| LRRTM2          | 0,6880          | 0,1911          | 0,0000         | 0,3938          |
| ZP1             | 0,8630          | 0,1274          | 0,0000         | 0,2929          |
| CRISPLD1        | 0,7266          | 0,0637          | 0,0000         | 0,0000          |
| ZCCHC16         | 0,7206          | 0,0637          | 0,0000         | 0,2929          |
| DPP6            | 0,6819          | 0,0637          | 0,0000         | 1,2676          |
| ANO9            | 3,5611          | 4,0761          | 0,0622         | 4,0703          |
| LARGE           | 3,6491          | 2,9297          | 0,0622         | 3,0995          |
| FAAH2           | 1,3979          | 2,6112          | 0,0622         | 3,8195          |
| ZNF697          | 2,5314          | 3,4392          | 0,1244         | 1,9113          |
| C10orf107       | 6,5094          | 8,0885          | 0,3111         | 14,7982         |
| GPR158          | 12,6412         | 7,7064          | 0,3111         | 0,3517          |
| TMEM151B        | 2,0996          | 2,8023          | 0,1244         | 8,8842          |
| ANGPTL6         | 1,2169          | 2,0380          | 0,1244         | 2,2473          |
| GBGT1           | 2,2579          | 1,7833          | 0,1244         | 2,5137          |
| TUBA4A          | 16,4543         | 31,9081         | 2,2399         | 19,5230         |
| TMOD1           | 1,8556          | 1,5922          | 0,1244         | 1,9808          |
| F2RL2           | 5,2113          | 6,7510          | 0,5600         | 2,6107          |
| PIANP           | 4,3288          | 4,1398          | 0,3733         | 3,9537          |
| FXVD2           | 4,7035          | 0,6369          | 0,0622         | 4,3849          |
| GCA             | 3,5505          | 0,6369          | 0,0622         | 2,1630          |
| <b>ANXA1</b>    | <b>232,6092</b> | <b>158,1394</b> | <b>15,8040</b> | <b>113,4199</b> |
| PYGL            | 8,5059          | 3,6940          | 0,3733         | 11,2002         |
| ATP2B2          | 3,3594          | 0,5732          | 0,0622         | 7,5129          |
| ITGA6           | 8,0081          | 26,3035         | 2,8621         | 12,5178         |
| GZMA            | 37,1217         | 19,3614         | 2,1155         | 37,1296         |
| UBXN10          | 5,5305          | 8,8528          | 0,9955         | 12,4539         |
| LSP1            | 2,9489          | 3,1844          | 0,3733         | 1,8485          |
| PTCRA           | 1,6450          | 1,0190          | 0,1244         | 0,8092          |
| <b>TNFRSF14</b> | <b>9,9424</b>   | <b>12,4193</b>  | <b>1,6177</b>  | <b>11,6105</b>  |
| SLC25A21        | 1,5866          | 1,4012          | 0,1867         | 1,8270          |
| SIGLEC6         | 5,6690          | 2,2928          | 0,3111         | 1,3156          |
| ITGB2-AS1       | 5,5804          | 10,8908         | 1,4933         | 5,7023          |
| PCBP3           | 3,9832          | 3,6303          | 0,4978         | 18,6150         |
| BCAM            | 1,3267          | 1,3375          | 0,1867         | 1,6673          |
| GPR68           | 2,7633          | 2,9934          | 0,4355         | 4,4210          |
| GSTM3           | 37,5542         | 22,9917         | 3,3599         | 18,8696         |
| BST2            | 44,9524         | 104,5134        | 15,3685        | 66,2490         |

|               |          |          |         |          |
|---------------|----------|----------|---------|----------|
| IER3          | 8,4907   | 7,7700   | 1,1822  | 5,5692   |
| TRPM2         | 5,8159   | 6,4326   | 0,9955  | 10,6309  |
| <b>STAT5A</b> | 13,3907  | 17,6418  | 2,8621  | 6,8289   |
| LOC90246      | 1,7427   | 1,1464   | 0,1867  | 0,5114   |
| SMAP1         | 31,5560  | 21,7179  | 3,7955  | 27,1142  |
| PI16          | 29,3594  | 49,1678  | 8,6487  | 11,7409  |
| GFRA3         | 2,1927   | 2,1017   | 0,3733  | 1,3205   |
| CRIM1         | 1,5820   | 0,7006   | 0,1244  | 1,0972   |
| CD69          | 12,0947  | 12,2283  | 2,2399  | 12,0202  |
| CTSW          | 36,0529  | 52,0338  | 9,5820  | 101,1831 |
| EFNB3         | 3,6847   | 2,2928   | 0,4355  | 2,0768   |
| PLCH1         | 21,9898  | 19,9346  | 3,9821  | 19,4173  |
| CST7          | 26,6965  | 26,3035  | 5,3510  | 117,9958 |
| PLEK          | 54,0085  | 14,5211  | 2,9866  | 106,6130 |
| GNLY          | 4,6648   | 0,8916   | 0,1867  | 18,0264  |
| PRKCH         | 198,9677 | 305,3880 | 64,2116 | 196,0620 |
| ADCYAP1       | 20,7476  | 20,2531  | 4,2932  | 4,2035   |
| CD300A        | 2,4352   | 0,5732   | 0,1244  | 0,4369   |
| PDE9A         | 6,0229   | 8,4069   | 1,8666  | 4,0478   |
| IFI35         | 12,2411  | 13,6931  | 3,0488  | 16,1884  |
| USP40         | 17,5236  | 25,5392  | 5,7243  | 19,9463  |
| GAS7          | 94,4084  | 139,4786 | 32,3547 | 101,6567 |
| HECW1         | 7,2178   | 2,6749   | 0,6222  | 1,8535   |
| LPCAT2        | 10,7652  | 10,8908  | 2,6133  | 17,6029  |
| <b>LGALS1</b> | 63,0176  | 4,9040   | 1,1822  | 107,6043 |
| AKAP7         | 4,4551   | 2,8023   | 0,6844  | 4,2487   |
| DENND2D       | 3,8718   | 3,5666   | 0,8711  | 3,7715   |
| SMPD3         | 3,1254   | 1,7196   | 0,4355  | 0,5701   |
| C16orf74      | 2,3966   | 2,4202   | 0,6222  | 8,1015   |
| PCCA          | 11,8957  | 13,7568  | 3,5466  | 14,7032  |
| TNFSF10       | 14,1815  | 15,0306  | 3,9199  | 21,9496  |
| TDRD9         | 35,7427  | 21,4631  | 5,6621  | 28,5570  |
| EGR1          | 10,0812  | 8,0248   | 2,1777  | 11,5017  |
| C19orf59      | 1,9435   | 0,8916   | 0,2489  | 1,3156   |
| LAIR1         | 109,1083 | 81,8402  | 23,3327 | 75,0209  |
| LST1          | 6,2562   | 5,1588   | 1,4933  | 4,6297   |
| SLC2A3        | 15,1188  | 13,6294  | 3,9821  | 9,4554   |
| KLHL29        | 20,2388  | 24,3928  | 7,1554  | 40,9360  |
| <b>IL4R</b>   | 8,4943   | 11,6551  | 3,4221  | 25,3313  |
| BMP10         | 6,0146   | 4,0124   | 1,1822  | 6,8975   |
| IFI30         | 22,0016  | 29,1695  | 8,8353  | 29,6365  |
| CHRNA3        | 24,9003  | 35,7931  | 11,0753 | 52,4075  |
| DPEP2         | 2,2761   | 1,4012   | 0,4355  | 1,0972   |
| FAM101B       | 35,2872  | 54,8361  | 17,0484 | 39,8864  |
| NRBP2         | 9,7002   | 5,5409   | 1,7422  | 11,6457  |
| GPA33         | 12,0305  | 14,1389  | 4,4799  | 13,1544  |
| SIRPB1        | 8,5868   | 5,4136   | 1,7422  | 15,4232  |
| MSH5-SAPCD1   | 5,0689   | 4,5219   | 1,4933  | 5,7269   |
| H6PD          | 52,2552  | 60,9502  | 20,3461 | 39,6230  |
| HLF           | 6,9214   | 2,4202   | 0,8089  | 2,6685   |

|              |          |          |          |          |
|--------------|----------|----------|----------|----------|
| SLC16A3      | 9,5840   | 9,3623   | 3,1732   | 9,0361   |
| AIG1         | 64,4390  | 91,5846  | 31,1103  | 62,6788  |
| GLDC         | 34,5223  | 31,8444  | 10,8886  | 23,0093  |
| GALNT6       | 15,5484  | 18,6608  | 6,4709   | 14,8100  |
| DHX32        | 22,6168  | 21,2084  | 7,4042   | 26,5959  |
| PTPN3        | 52,0431  | 49,8684  | 17,4840  | 38,9746  |
| <b>ITGAL</b> | 26,2732  | 30,9528  | 10,8886  | 27,9478  |
| KLHL35       | 5,5144   | 2,1017   | 0,7466   | 1,2725   |
| IL32         | 621,6479 | 144,5737 | 53,5719  | 1,5067   |
| CD244        | 7,0395   | 5,5409   | 2,0533   | 11,2276  |
| SQRDL        | 35,7659  | 36,5574  | 13,5641  | 44,7357  |
| RGS2         | 3,3898   | 1,3375   | 0,4978   | 1,3950   |
| LIMD2        | 58,5659  | 42,7989  | 16,3640  | 51,4402  |
| RAET1E       | 11,4925  | 9,1712   | 3,5466   | 17,3982  |
| EMID1        | 12,1328  | 12,1646  | 4,7288   | 12,6283  |
| SLA          | 478,0886 | 376,9743 | 146,5916 | 462,1445 |
| TTC16        | 27,7892  | 29,0421  | 11,3241  | 15,9542  |
| LACTB2       | 11,5229  | 7,0058   | 2,7377   | 8,2769   |
| SPINK2       | 2,4459   | 0,3184   | 0,1244   | 0,4849   |
| SKAP1        | 18,3071  | 19,4888  | 7,6531   | 20,7486  |
| GVINP1       | 47,6777  | 45,6649  | 18,1062  | 50,8067  |
| DNTT         | 37,2784  | 9,8718   | 3,9199   | 66,5260  |
| FLOT1        | 89,8745  | 90,6929  | 36,5235  | 70,0579  |
| KIAA0125     | 17,8081  | 12,9288  | 5,2265   | 17,1609  |
| PTPN6        | 210,8397 | 164,6357 | 66,5760  | 185,7251 |
| <b>HES1</b>  | 19,0670  | 16,4317  | 6,7820   | 4,6797   |
| TSHZ3        | 18,5028  | 20,7626  | 8,6487   | 23,3220  |
| CPA4         | 12,1662  | 3,5666   | 1,4933   | 34,1661  |
| RMRP         | 19,3306  | 3,1208   | 1,3066   | 1,0600   |
| ZAP70        | 451,6591 | 396,3994 | 166,0044 | 585,9785 |
| MAL          | 42,5390  | 25,5392  | 10,7642  | 20,1643  |
| TEX19        | 26,7968  | 8,4069   | 3,5466   | 9,1418   |
| FAIM3        | 15,6537  | 7,6427   | 3,2355   | 10,2714  |
| ADC          | 6,7821   | 5,8594   | 2,4888   | 6,7760   |
| SPSB1        | 12,3570  | 10,6360  | 4,5421   | 7,0886   |
| CCDC102B     | 11,6085  | 5,6683   | 2,4266   | 10,3204  |
| RHBDL3       | 5,6440   | 3,5666   | 1,5555   | 6,2941   |
| ZNF616       | 12,6664  | 11,5277  | 5,0399   | 12,0964  |
| ABI3         | 8,4846   | 7,5153   | 3,3599   | 7,8194   |
| <b>JAK3</b>  | 25,9808  | 23,6923  | 10,7642  | 21,2217  |
| APOBEC3B     | 26,9777  | 25,2845  | 11,5108  | 25,3480  |
| TSPAN9       | 9,7492   | 8,2796   | 3,7955   | 10,9797  |
| ERP27        | 5,5296   | 3,3755   | 1,5555   | 3,8509   |
| LAT          | 68,6253  | 69,2935  | 32,1058  | 70,2288  |
| LOC100130476 | 6,2766   | 4,2035   | 1,9911   | 7,7332   |
| CECR1        | 44,9476  | 43,6269  | 20,8439  | 62,8255  |
| IL16         | 28,6884  | 16,8139  | 8,0887   | 27,0064  |
| RCBTB2       | 25,6701  | 14,3937  | 6,9687   | 15,2813  |
| NDFIP2       | 36,9922  | 14,6484  | 7,0931   | 41,5746  |
| CD82         | 295,4044 | 198,7729 | 96,2552  | 206,1652 |

|           |          |          |          |          |
|-----------|----------|----------|----------|----------|
| BIN2      | 78,8526  | 59,2943  | 28,8081  | 89,3595  |
| LPAR5     | 17,7956  | 12,4193  | 6,0354   | 27,9518  |
| LOC440354 | 3,2565   | 1,4012   | 0,6844   | 2,6195   |
| MAGEB18   | 3,5566   | 0,7643   | 0,3733   | 2,2904   |
| C1orf186  | 3,4482   | 1,5285   | 0,7466   | 3,0368   |
| UGT3A2    | 5,9909   | 0,3821   | 0,1867   | 5,0902   |
| GYPC      | 189,0652 | 170,5587 | 83,6244  | 244,8064 |
| HPGD      | 15,1422  | 4,7767   | 2,3644   | 5,3419   |
| LIMS2     | 4,3642   | 9,9355   | 20,0972  | 3,9724   |
| ATP2B3    | 0,0000   | 2,6749   | 5,5998   | 0,1225   |
| DNAJC12   | 0,0773   | 0,8916   | 1,8666   | 0,0960   |
| SLC9A7    | 8,6081   | 12,9288  | 27,6881  | 13,0369  |
| TMEM100   | 0,0000   | 0,3184   | 0,6844   | 0,5055   |
| ZNF211    | 15,7289  | 17,2597  | 37,7057  | 10,5536  |
| TNIK      | 28,6610  | 46,8113  | 102,6017 | 26,1868  |
| RAG2      | 13,0955  | 17,3234  | 38,7012  | 13,9145  |
| TGFB3     | 3,4467   | 5,2862   | 11,8219  | 4,9706   |
| FAM84B    | 9,5688   | 11,4640  | 25,8837  | 9,0263   |
| IKZF3     | 3,7142   | 5,2225   | 11,8219  | 28,8514  |
| MFAP4     | 0,1129   | 5,4136   | 12,3197  | 2,9055   |
| FKBP9L    | 0,0000   | 0,1911   | 0,4355   | 0,3194   |
| EPHB6     | 44,3400  | 40,1877  | 92,5842  | 34,7260  |
| HYDIN     | 2,5792   | 3,6303   | 8,5864   | 1,9485   |
| PPP2R2B   | 0,4948   | 0,9553   | 2,3022   | 0,5858   |
| SRGAP1    | 1,7366   | 2,8660   | 6,9065   | 5,8083   |
| SLC12A6   | 19,7711  | 17,8329  | 43,1811  | 49,0547  |
| MAT1A     | 3,5082   | 5,3499   | 13,3774  | 1,0717   |
| TLE1      | 25,9050  | 25,4755  | 64,2738  | 30,8435  |
| MIR181B1  | 0,0000   | 0,1911   | 0,4978   | 0,0852   |
| TMEM178B  | 0,7175   | 2,1654   | 5,6621   | 1,1236   |
| CKM       | 0,0000   | 0,4458   | 1,1822   | 0,1489   |
| OR2C1     | 0,0000   | 0,2548   | 0,6844   | 0,0960   |
| IFI44L    | 0,0386   | 0,3821   | 1,0577   | 0,0372   |
| RGS4      | 0,0000   | 0,2548   | 0,7466   | 0,1225   |
| ACTC1     | 0,0000   | 0,2548   | 0,7466   | 0,0000   |
| AP1B1     | 26,9615  | 38,0222  | 113,0547 | 32,0132  |
| PLEKHG1   | 0,9835   | 1,8470   | 5,8487   | 0,9640   |
| NYNRIN    | 0,1531   | 0,9553   | 3,0488   | 0,4154   |
| ADAMTS3   | 0,1546   | 0,3821   | 1,2444   | 1,8436   |
| SPTLC3    | 1,8261   | 2,0380   | 6,8443   | 5,4957   |
| ZNF83     | 15,6750  | 11,8461  | 40,0700  | 0,1969   |
| ZBBX      | 0,0000   | 0,1274   | 0,4355   | 0,0000   |
| LGALS3BP  | 0,6509   | 5,9868   | 22,7727  | 3,0995   |
| PSD3      | 0,3819   | 0,6369   | 2,4266   | 0,6446   |
| CD79A     | 6,0222   | 4,4582   | 17,2351  | 13,5326  |
| PBX1      | 0,0758   | 0,4458   | 1,7422   | 0,5006   |
| PRKAA2    | 0,0742   | 0,2548   | 1,0577   | 0,0000   |
| PHLDB2    | 7,0419   | 9,5533   | 41,8122  | 19,3164  |
| EOMES     | 1,3888   | 2,2291   | 10,2042  | 38,4467  |
| GALC      | 2,0305   | 1,7833   | 8,2753   | 0,3674   |



|              |                |                |                |                |
|--------------|----------------|----------------|----------------|----------------|
| PCED1B-AS1   | 0,1515         | 0,5732         | 2,7377         | 0,7563         |
| CYTH4        | 0,1485         | 0,5732         | 2,7377         | 2,6549         |
| GPC5         | 0,3448         | 0,9553         | 4,9154         | 0,0000         |
| TLL1         | 2,6519         | 2,2291         | 11,5108        | 3,3601         |
| ZNF385B      | 2,0117         | 1,1464         | 5,9732         | 3,4983         |
| ZNF772       | 0,6478         | 3,2481         | 16,9862        | 1,6820         |
| RGPD3        | 2,4769         | 2,1017         | 11,1997        | 0,3409         |
| PRUNE2       | 1,0236         | 1,1464         | 6,5332         | 0,1440         |
| BEST1        | 0,0371         | 0,3821         | 2,3022         | 0,6867         |
| SMARCA1      | 2,1322         | 6,6873         | 41,1900        | 22,0886        |
| EVPLL        | 0,0742         | 0,1911         | 1,1822         | 0,0480         |
| <b>AMER1</b> | <b>23,2847</b> | <b>10,6360</b> | <b>66,2649</b> | <b>29,5464</b> |
| CLEC11A      | 1,7192         | 4,5219         | 28,2481        | 1,3587         |
| SDC2         | 0,6448         | 0,3821         | 2,4266         | 8,3542         |
| HHEX         | 0,0773         | 0,2548         | 1,6177         | 0,0000         |
| STX1B        | 0,1887         | 0,1911         | 1,3066         | 0,3037         |
| LIN28B       | 0,3864         | 0,5095         | 3,5466         | 0,3252         |
| DBH          | 0,0000         | 0,0637         | 0,4978         | 0,0000         |
| TC2N         | 0,1902         | 0,3821         | 3,0488         | 0,0000         |
| PTPRG        | 0,3046         | 1,2101         | 9,8931         | 1,3685         |
| C11orf74     | 0,0386         | 0,5095         | 4,2310         | 0,5065         |
| AKR1C6P      | 5,4213         | 1,7833         | 15,3063        | 1,4538         |
| C2orf16      | 0,0000         | 0,0637         | 0,5600         | 0,0372         |
| ADAMTS18     | 2,6595         | 0,8280         | 7,2798         | 15,1500        |
| RAG1         | 13,1222        | 10,9545        | 105,0905       | 9,2377         |
| PPAP2B       | 0,0758         | 0,1911         | 1,8666         | 0,0852         |
| RNF43        | 0,5319         | 0,3821         | 3,7332         | 0,8680         |
| COBL         | 0,1129         | 0,3821         | 3,8577         | 0,0480         |
| AKR1C3       | 0,0371         | 0,1274         | 1,3066         | 0,0480         |
| TRPS1        | 0,0386         | 0,2548         | 2,8621         | 0,4526         |
| <b>CXXC4</b> | <b>0,3804</b>  | <b>0,1911</b>  | <b>2,3022</b>  | <b>0,0745</b>  |
| PTPRD        | 0,0758         | 1,9107         | 23,9549        | 0,3781         |
| IRF4         | 0,0386         | 0,0637         | 0,8089         | 0,0852         |
| SORBS2       | 0,0000         | 0,5732         | 7,2798         | 0,0480         |
| GABRB2       | 7,0139         | 3,0571         | 48,4076        | 12,4824        |
| HLA-DOA      | 1,3994         | 0,5732         | 9,0842         | 3,3983         |
| TRIM29       | 0,0000         | 0,0637         | 1,2444         | 0,2341         |
| STARD13      | 0,0773         | 0,0637         | 1,7422         | 1,1501         |
| SOX5         | 0,1485         | 0,6369         | 18,1684        | 0,0745         |
| APP          | 0,1856         | 0,1274         | 3,9821         | 0,6495         |
| CACNB2       | 0,0000         | 0,0637         | 2,0533         | 0,2929         |
| TSPEAR       | 0,3016         | 0,0637         | 2,2399         | 0,0480         |
| RASEF        | 0,0371         | 0,3184         | 14,1241        | 0,9855         |
| GABRA3       | 0,0773         | 0,0637         | 3,8577         | 1,8270         |
| INPP4B       | 0,0000         | 0,0000         | 0,4355         | 0,0000         |
| FLRT3        | 0,0000         | 0,0000         | 0,4355         | 0,0000         |
| VN1R1        | 0,0000         | 0,0000         | 0,4978         | 0,0000         |
| PLD1         | 0,0000         | 0,0000         | 0,4978         | 0,0000         |
| ROR2         | 0,0000         | 0,0000         | 0,5600         | 0,1225         |
| SCEL         | 0,0000         | 0,0000         | 0,5600         | 0,0000         |

|       |        |        |        |        |
|-------|--------|--------|--------|--------|
| HCG23 | 0,0000 | 0,0000 | 0,6222 | 0,0000 |
| LIX1  | 0,0758 | 0,0000 | 0,8711 | 0,0000 |
| CAPN6 | 0,0000 | 0,0000 | 0,9333 | 0,0000 |
| SDSL  | 0,2258 | 0,0000 | 1,5555 | 1,3156 |
| CREB5 | 0,1144 | 0,0000 | 3,3599 | 0,0480 |

table S3. GO term analysis of -/A versus WT and G/- down-regulated genes.

| Go-term analysis ( <a href="http://amp.pharm.mssm.edu/Enrichr/">http://amp.pharm.mssm.edu/Enrichr/</a> ) |         |          |                  |             |                      |          |                |         |         |          |                     |                                                      |
|----------------------------------------------------------------------------------------------------------|---------|----------|------------------|-------------|----------------------|----------|----------------|---------|---------|----------|---------------------|------------------------------------------------------|
| -/A vs WT & G/- down regulated genes                                                                     |         |          |                  |             |                      |          |                |         |         |          |                     |                                                      |
| Term                                                                                                     | Overlap | P-value  | Adjusted P-value | Old P-value | Old Adjusted P-value | Z-score  | Combined Score | Genes   |         |          |                     |                                                      |
| negative regulation of alpha-beta T cell activation (GO:0046636)                                         | 4/19    | 1.14E-05 | 0.007110384      | 2.306E-05   | 0.008985301          | -2.81977 | 13.94712595    | IL4R    | CD300A  | TNFRSF14 | JAK3                |                                                      |
| regulation of cell activation (GO:0050865)                                                               | 13/420  | 2.01E-05 | 0.007420925      | 1.946E-05   | 0.008985301          | -2.52287 | 12.37074968    | STAT5A  | IL4R    | CD300A   | LST1                | PLEK ITGAL ZAP70 LGALS1 TNFRSF14 PTPN6 HES1 JAK3 LAT |
| regulation of lymphocyte activation (GO:0051249)                                                         | 12/344  | 1.31E-05 | 0.007110384      | 1.329E-05   | 0.008985301          | -2.50051 | 12.36803498    | STAT5A  | ZAP70   | LGALS1   | IL4R                | CD300A LST1 HES1 TNFRSF14 PTPN6 ITGAL JAK3 LAT       |
| regulation of leukocyte activation (GO:0002694)                                                          | 12/390  | 4.47E-05 | 0.007420925      | 4.394E-05   | 0.011542311          | -2.513   | 12.32234948    | STAT5A  | ZAP70   | LGALS1   | IL4R                | CD300A LST1 TNFRSF14 PTPN6 HES1 ITGAL JAK3 LAT       |
| regulation of T cell activation (GO:0050863)                                                             | 11/259  | 4.81E-06 | 0.007110384      | 5.283E-06   | 0.008626579          | -2.461   | 12.17259303    | STAT5A  | ZAP70   | LGALS1   | IL4R                | CD300A TNFRSF14 PTPN6 HES1 ITGAL JAK3 LAT            |
| negative regulation of immune system process (GO:0002683)                                                | 11/211  | 2.67E-05 | 0.007420925      | 2.751E-05   | 0.008985301          | -2.45097 | 12.01821632    | BST2    | STAT5A  | ADCYAP1  | IL4R                | GPR68 CD300A LST1 TNFRSF14 PTPN6 HES1 JAK3           |
| negative regulation of muscle hypertrophy (GO:0014741)                                                   | 3/10    | 4.97E-05 | 0.007420925      | 0.0001087   | 0.01389582           | -2.40784 | 11.8067472     | BMP10   | RG52    | PI16     |                     |                                                      |
| regulation of lymphocyte proliferation (GO:0050670)                                                      | 8/170   | 4.8E-05  | 0.007420925      | 5.435E-05   | 0.011542311          | -2.39045 | 11.72147707    | STAT5A  | ZAP70   | CD300A   | LST1                | TNFRSF14 PTPN6 HES1 ITGAL                            |
| regulation of mononuclear cell proliferation (GO:0032944)                                                | 8/171   | 5E-05    | 0.007420925      | 5.655E-05   | 0.011542311          | -2.38645 | 11.7018626     | STAT5A  | ZAP70   | CD300A   | LST1                | TNFRSF14 PTPN6 HES1 ITGAL                            |
| negative regulation of cardiac muscle hypertrophy (GO:0010614)                                           | 3/9     | 3.5E-05  | 0.007420925      | 8.408E-05   | 0.01248172           | -2.35276 | 11.53665581    | BMP10   | RG52    | PI16     |                     |                                                      |
| regulation of leukocyte proliferation (GO:0070653)                                                       | 8/176   | 6.13E-05 | 0.00833752       | 6.866E-05   | 0.012458499          | -2.38568 | 11.4200588     | STAT5A  | ZAP70   | CD300A   | LST1                | TNFRSF14 PTPN6 HES1 ITGAL                            |
| thrombin receptor signaling pathway (GO:0070493)                                                         | 3/9     | 3.5E-05  | 0.007420925      | 8.408E-05   | 0.01248172           | -2.31554 | 11.35414795    | HPGD    | PLEK    | F2RL2    |                     |                                                      |
| negative regulation of leukocyte mediated immunity (GO:0002704)                                          | 4/34    | 0.000125 | 0.01234564       | 0.0001764   | 0.016949509          | -2.50356 | 11.00176688    | BST2    | CD300A  | PTPN6    | JAK3                |                                                      |
| regulation of B cell receptor signaling pathway (GO:0050855)                                             | 3/13    | 0.000116 | 0.01234564       | 0.0002094   | 0.018991166          | -2.48029 | 10.89953766    | PRKCH   | CD300A  | PTPN6    | HES1                |                                                      |
| regulation of glial cell proliferation (GO:0060251)                                                      | 3/15    | 0.000183 | 0.015739091      | 0.0003019   | 0.020539492          | -2.48753 | 10.32725119    | ADCYAP1 | PRKCH   | HES1     |                     |                                                      |
| positive regulation of T cell activation (GO:0050870)                                                    | 8/189   | 0.000101 | 0.01234564       | 0.0001106   | 0.01389582           | -2.31267 | 10.16290134    | STAT5A  | ZAP70   | LGALS1   | IL4R                | TNFRSF14 PTPN6 HES1 ITGAL                            |
| negative regulation of lymphocyte activation (GO:0051250)                                                | 6/102   | 0.000129 | 0.01234564       | 0.0001531   | 0.016435011          | -2.25827 | 9.923840189    | IL4R    | CD300A  | LST1     | TNFRSF14 PTPN6 JAK3 |                                                      |
| negative regulation of immune response (GO:0050777)                                                      | 6/103   | 0.000136 | 0.01234564       | 0.0001611   | 0.016435011          | -2.20943 | 9.682862807    | BST2    | ADCYAP1 | IL4R     | CD300A              | PTPN6 JAK3                                           |
| positive regulation of cell activation (GO:0050867)                                                      | 9/272   | 0.000241 | 0.01871675       | 0.0002474   | 0.019649793          | -2.39548 | 9.530006345    | STAT5A  | ZAP70   | LGALS1   | IL4R                | PLEK TNFRSF14 PTPN6 HES1 ITGAL                       |
| regulation of alpha-beta T cell activation (GO:0046634)                                                  | 5/63    | 0.000117 | 0.01234564       | 0.0001496   | 0.016435011          | -2.1497  | 9.446745115    | ZAP70   | IL4R    | CD300A   | TNFRSF14 JAK3       |                                                      |
| -/A vs WT & G/- up regulated genes                                                                       |         |          |                  |             |                      |          |                |         |         |          |                     |                                                      |
| Term                                                                                                     | Overlap | P-value  | Adjusted P-value | Old P-value | Old Adjusted P-value | Z-score  | Combined Score | Genes   |         |          |                     |                                                      |
| Wnt signaling pathway (GO:0016055)                                                                       | 9/234   | 2.06E-06 | 0.002406062      | 5.877E-06   | 0.006864484          | -2.33521 | 14.08078829    | AMER1   | RNF43   | HHEX     | TLE1                | PRKAA2 PPAP2B ROR2 TNIK CXCC4                        |
| regulation of Wnt signaling pathway (GO:0030111)                                                         | 7/214   | 8.28E-05 | 0.048337881      | 0.0001808   | 0.105590527          | -2.36183 | 7.155267604    | AMER1   | RNF43   | HHEX     | TLE1                | PPAP2B ROR2 CXCC4                                    |
| regulation of neuron differentiation (GO:0045664)                                                        | 9/405   | 0.000156 | 0.060574599      | 0.0003627   | 0.141229462          | -2.38555 | 6.888663217    | EOMES   | PTPRD   | APP      | SDC2                | COBL TNIK PBX1 SOX5 PTPRG                            |
| positive regulation of G2/M transition of mitotic cell cycle (GO:0010971)                                | 2/14    | 0.00204  | 0.113441367      | 0.0032522   | 0.180882111          | -2.60583 | 5.671502706    | APP     | PBX1    |          |                     |                                                      |
| fibril organization (GO:0097435)                                                                         | 2/14    | 0.00204  | 0.113441367      | 0.0032522   | 0.180882111          | -2.58071 | 5.616844562    | MFAP4   | ADAMT3S |          |                     |                                                      |
| positive regulation of cell cycle G2/M phase transition (GO:1902751)                                     | 2/14    | 0.00204  | 0.113441367      | 0.0032522   | 0.180882111          | -2.56874 | 5.590794407    | APP     | PBX1    |          |                     |                                                      |
| T cell lineage commitment (GO:0002360)                                                                   | 2/12    | 0.001489 | 0.110363586      | 0.0024834   | 0.180882111          | -2.5128  | 5.53850311     | IRF4    | RAG2    |          |                     |                                                      |
| extracellular fibril organization (GO:0043206)                                                           | 2/12    | 0.001489 | 0.110363586      | 0.0024834   | 0.180882111          | -2.49737 | 5.504152017    | MFAP4   | ADAMT3S |          |                     |                                                      |
| VDJ recombination (GO:0033151)                                                                           | 2/16    | 0.002673 | 0.130069855      | 0.0041178   | 0.206030672          | -2.68048 | 5.467338683    | RAG2    | RAG1    |          |                     |                                                      |
| negative regulation of Wnt signaling pathway (GO:0030178)                                                | 5/126   | 0.000372 | 0.093354279      | 0.0006877   | 0.172060453          | -2.27836 | 5.402793201    | AMER1   | RNF43   | TLE1     | ROR2                | CXCC4                                                |
| response to light stimulus (GO:0009416)                                                                  | 7/322   | 0.000979 | 0.110363586      | 0.0019082   | 0.180882111          | -2.38069 | 5.246975331    | MFAP4   | APP     | SDC2     | AKR1C3              | GPC5 DBH BEST1                                       |
| B cell activation (GO:0042113)                                                                           | 5/128   | 0.0004   | 0.093354279      | 0.0007366   | 0.172060453          | -2.16852 | 5.142322765    | CD79A   | HHEX    | RAG2     | IKZF3               | RAG1                                                 |
| lymphocyte activation (GO:0046649)                                                                       | 7/304   | 0.000699 | 0.108841518      | 0.0013843   | 0.180882111          | -2.31394 | 5.131909594    | EOMES   | CD79A   | HHEX     | IRF4                | RAG2 IKZF3 RAG1                                      |
| leukocyte differentiation (GO:0002521)                                                                   | 6/251   | 0.001404 | 0.110363586      | 0.0025603   | 0.180882111          | -2.32475 | 5.123683466    | EOMES   | CD79A   | HHEX     | IRF4                | RAG2 RAG1                                            |
| leukocyte activation (GO:0045321)                                                                        | 7/373   | 0.002265 | 0.12026623       | 0.0024489   | 0.206030672          | -2.32584 | 4.927011656    | EOMES   | CD79A   | HHEX     | IRF4                | RAG2 IKZF3 RAG1                                      |
| lymphocyte differentiation (GO:0030098)                                                                  | 5/172   | 0.001512 | 0.110363586      | 0.0026111   | 0.180882111          | -2.22511 | 4.90408891     | EOMES   | CD79A   | HHEX     | RAG2                | RAG1                                                 |
| regulation of dendrite development (GO:0050773)                                                          | 4/89    | 0.000926 | 0.110363586      | 0.0015626   | 0.180882111          | -2.20161 | 4.852287074    | PTPRD   | SDC2    | COBL     | TNIK                |                                                      |
| B cell differentiation (GO:0030183)                                                                      | 4/80    | 0.00062  | 0.108841518      | 0.0010709   | 0.180882111          | -2.18121 | 4.83763109     | CD79A   | HHEX    | RAG2     | RAG1                |                                                      |
| detection of visible light (GO:0009584)                                                                  | 4/104   | 0.00165  | 0.113382092      | 0.0026998   | 0.180882111          | -2.18116 | 4.74837213     | SDC2    | AKR1C3  | GPC5     | BEST1               |                                                      |
| anion transmembrane transport (GO:0098656)                                                               | 5/172   | 0.001512 | 0.110363586      | 0.0026111   | 0.180882111          | -2.14829 | 4.734778726    | GABRR2  | PRKAA2  | GABRA3   | SLC12A6             | BEST1                                                |



**table S5. Cytokine secretion in CD4+ T cells after stimulation and infection with HIV as measured by Proteome Profiler Human XL Cytokine Array kit.**

| Label          | Control | CD4-alpha | CD4-gamma | control |       | CD4-alpha |       | CD4-gamma |       |
|----------------|---------|-----------|-----------|---------|-------|-----------|-------|-----------|-------|
|                |         |           |           | Average | Stdev | Average   | Stdev | Average   | Stdev |
| A1 Reference   | 777490  | 640384    | 439183    | 779017  | 27237 | 629767    | 42295 | 629767    | 42295 |
| A2 Reference   | 777492  | 640386    | 439185    | 779019  | 27239 | 629769    | 42297 | 629769    | 42297 |
| A3 Reference   | 777494  | 640388    | 439187    | 779021  | 27241 | 629771    | 42299 | 629771    | 42299 |
| A4 Reference   | 777496  | 640390    | 439189    | 779023  | 27243 | 629773    | 42301 | 629773    | 42301 |
| A5 Reference   | 777498  | 640392    | 439191    | 779025  | 27245 | 629775    | 42303 | 629775    | 42303 |
| A6 Reference   | 777500  | 640394    | 439193    | 779027  | 27247 | 629777    | 42305 | 629777    | 42305 |
| A7 Reference   | 777502  | 640396    | 439195    | 779029  | 27249 | 629779    | 42307 | 629779    | 42307 |
| A8 Reference   | 777504  | 640398    | 439197    | 779031  | 27251 | 629781    | 42309 | 629781    | 42309 |
| A9 Reference   | 777506  | 640400    | 439199    | 779033  | 27253 | 629783    | 42311 | 629783    | 42311 |
| A10 Reference  | 777508  | 640402    | 439201    | 779035  | 27255 | 629785    | 42313 | 629785    | 42313 |
| A11 Reference  | 777510  | 640404    | 439203    | 779037  | 27257 | 629787    | 42315 | 629787    | 42315 |
| A12 Reference  | 777512  | 640406    | 439205    | 779039  | 27259 | 629789    | 42317 | 629789    | 42317 |
| A13 Reference  | 777514  | 640408    | 439207    | 779041  | 27261 | 629791    | 42319 | 629791    | 42319 |
| A14 Reference  | 777516  | 640410    | 439209    | 779043  | 27263 | 629793    | 42321 | 629793    | 42321 |
| A15 Reference  | 777518  | 640412    | 439211    | 779045  | 27265 | 629795    | 42323 | 629795    | 42323 |
| A16 Reference  | 777520  | 640414    | 439213    | 779047  | 27267 | 629797    | 42325 | 629797    | 42325 |
| A17 Reference  | 777522  | 640416    | 439215    | 779049  | 27269 | 629799    | 42327 | 629799    | 42327 |
| A18 Reference  | 777524  | 640418    | 439217    | 779051  | 27271 | 629801    | 42329 | 629801    | 42329 |
| A19 Reference  | 777526  | 640420    | 439219    | 779053  | 27273 | 629803    | 42331 | 629803    | 42331 |
| A20 Reference  | 777528  | 640422    | 439221    | 779055  | 27275 | 629805    | 42333 | 629805    | 42333 |
| A21 Reference  | 777530  | 640424    | 439223    | 779057  | 27277 | 629807    | 42335 | 629807    | 42335 |
| A22 Reference  | 777532  | 640426    | 439225    | 779059  | 27279 | 629809    | 42337 | 629809    | 42337 |
| A23 Reference  | 777534  | 640428    | 439227    | 779061  | 27281 | 629811    | 42339 | 629811    | 42339 |
| A24 Reference  | 777536  | 640430    | 439229    | 779063  | 27283 | 629813    | 42341 | 629813    | 42341 |
| A25 Reference  | 777538  | 640432    | 439231    | 779065  | 27285 | 629815    | 42343 | 629815    | 42343 |
| A26 Reference  | 777540  | 640434    | 439233    | 779067  | 27287 | 629817    | 42345 | 629817    | 42345 |
| A27 Reference  | 777542  | 640436    | 439235    | 779069  | 27289 | 629819    | 42347 | 629819    | 42347 |
| A28 Reference  | 777544  | 640438    | 439237    | 779071  | 27291 | 629821    | 42349 | 629821    | 42349 |
| A29 Reference  | 777546  | 640440    | 439239    | 779073  | 27293 | 629823    | 42351 | 629823    | 42351 |
| A30 Reference  | 777548  | 640442    | 439241    | 779075  | 27295 | 629825    | 42353 | 629825    | 42353 |
| A31 Reference  | 777550  | 640444    | 439243    | 779077  | 27297 | 629827    | 42355 | 629827    | 42355 |
| A32 Reference  | 777552  | 640446    | 439245    | 779079  | 27299 | 629829    | 42357 | 629829    | 42357 |
| A33 Reference  | 777554  | 640448    | 439247    | 779081  | 27301 | 629831    | 42359 | 629831    | 42359 |
| A34 Reference  | 777556  | 640450    | 439249    | 779083  | 27303 | 629833    | 42361 | 629833    | 42361 |
| A35 Reference  | 777558  | 640452    | 439251    | 779085  | 27305 | 629835    | 42363 | 629835    | 42363 |
| A36 Reference  | 777560  | 640454    | 439253    | 779087  | 27307 | 629837    | 42365 | 629837    | 42365 |
| A37 Reference  | 777562  | 640456    | 439255    | 779089  | 27309 | 629839    | 42367 | 629839    | 42367 |
| A38 Reference  | 777564  | 640458    | 439257    | 779091  | 27311 | 629841    | 42369 | 629841    | 42369 |
| A39 Reference  | 777566  | 640460    | 439259    | 779093  | 27313 | 629843    | 42371 | 629843    | 42371 |
| A40 Reference  | 777568  | 640462    | 439261    | 779095  | 27315 | 629845    | 42373 | 629845    | 42373 |
| A41 Reference  | 777570  | 640464    | 439263    | 779097  | 27317 | 629847    | 42375 | 629847    | 42375 |
| A42 Reference  | 777572  | 640466    | 439265    | 779099  | 27319 | 629849    | 42377 | 629849    | 42377 |
| A43 Reference  | 777574  | 640468    | 439267    | 779101  | 27321 | 629851    | 42379 | 629851    | 42379 |
| A44 Reference  | 777576  | 640470    | 439269    | 779103  | 27323 | 629853    | 42381 | 629853    | 42381 |
| A45 Reference  | 777578  | 640472    | 439271    | 779105  | 27325 | 629855    | 42383 | 629855    | 42383 |
| A46 Reference  | 777580  | 640474    | 439273    | 779107  | 27327 | 629857    | 42385 | 629857    | 42385 |
| A47 Reference  | 777582  | 640476    | 439275    | 779109  | 27329 | 629859    | 42387 | 629859    | 42387 |
| A48 Reference  | 777584  | 640478    | 439277    | 779111  | 27331 | 629861    | 42389 | 629861    | 42389 |
| A49 Reference  | 777586  | 640480    | 439279    | 779113  | 27333 | 629863    | 42391 | 629863    | 42391 |
| A50 Reference  | 777588  | 640482    | 439281    | 779115  | 27335 | 629865    | 42393 | 629865    | 42393 |
| A51 Reference  | 777590  | 640484    | 439283    | 779117  | 27337 | 629867    | 42395 | 629867    | 42395 |
| A52 Reference  | 777592  | 640486    | 439285    | 779119  | 27339 | 629869    | 42397 | 629869    | 42397 |
| A53 Reference  | 777594  | 640488    | 439287    | 779121  | 27341 | 629871    | 42399 | 629871    | 42399 |
| A54 Reference  | 777596  | 640490    | 439289    | 779123  | 27343 | 629873    | 42401 | 629873    | 42401 |
| A55 Reference  | 777598  | 640492    | 439291    | 779125  | 27345 | 629875    | 42403 | 629875    | 42403 |
| A56 Reference  | 777600  | 640494    | 439293    | 779127  | 27347 | 629877    | 42405 | 629877    | 42405 |
| A57 Reference  | 777602  | 640496    | 439295    | 779129  | 27349 | 629879    | 42407 | 629879    | 42407 |
| A58 Reference  | 777604  | 640498    | 439297    | 779131  | 27351 | 629881    | 42409 | 629881    | 42409 |
| A59 Reference  | 777606  | 640500    | 439299    | 779133  | 27353 | 629883    | 42411 | 629883    | 42411 |
| A60 Reference  | 777608  | 640502    | 439301    | 779135  | 27355 | 629885    | 42413 | 629885    | 42413 |
| A61 Reference  | 777610  | 640504    | 439303    | 779137  | 27357 | 629887    | 42415 | 629887    | 42415 |
| A62 Reference  | 777612  | 640506    | 439305    | 779139  | 27359 | 629889    | 42417 | 629889    | 42417 |
| A63 Reference  | 777614  | 640508    | 439307    | 779141  | 27361 | 629891    | 42419 | 629891    | 42419 |
| A64 Reference  | 777616  | 640510    | 439309    | 779143  | 27363 | 629893    | 42421 | 629893    | 42421 |
| A65 Reference  | 777618  | 640512    | 439311    | 779145  | 27365 | 629895    | 42423 | 629895    | 42423 |
| A66 Reference  | 777620  | 640514    | 439313    | 779147  | 27367 | 629897    | 42425 | 629897    | 42425 |
| A67 Reference  | 777622  | 640516    | 439315    | 779149  | 27369 | 629899    | 42427 | 629899    | 42427 |
| A68 Reference  | 777624  | 640518    | 439317    | 779151  | 27371 | 629901    | 42429 | 629901    | 42429 |
| A69 Reference  | 777626  | 640520    | 439319    | 779153  | 27373 | 629903    | 42431 | 629903    | 42431 |
| A70 Reference  | 777628  | 640522    | 439321    | 779155  | 27375 | 629905    | 42433 | 629905    | 42433 |
| A71 Reference  | 777630  | 640524    | 439323    | 779157  | 27377 | 629907    | 42435 | 629907    | 42435 |
| A72 Reference  | 777632  | 640526    | 439325    | 779159  | 27379 | 629909    | 42437 | 629909    | 42437 |
| A73 Reference  | 777634  | 640528    | 439327    | 779161  | 27381 | 629911    | 42439 | 629911    | 42439 |
| A74 Reference  | 777636  | 640530    | 439329    | 779163  | 27383 | 629913    | 42441 | 629913    | 42441 |
| A75 Reference  | 777638  | 640532    | 439331    | 779165  | 27385 | 629915    | 42443 | 629915    | 42443 |
| A76 Reference  | 777640  | 640534    | 439333    | 779167  | 27387 | 629917    | 42445 | 629917    | 42445 |
| A77 Reference  | 777642  | 640536    | 439335    | 779169  | 27389 | 629919    | 42447 | 629919    | 42447 |
| A78 Reference  | 777644  | 640538    | 439337    | 779171  | 27391 | 629921    | 42449 | 629921    | 42449 |
| A79 Reference  | 777646  | 640540    | 439339    | 779173  | 27393 | 629923    | 42451 | 629923    | 42451 |
| A80 Reference  | 777648  | 640542    | 439341    | 779175  | 27395 | 629925    | 42453 | 629925    | 42453 |
| A81 Reference  | 777650  | 640544    | 439343    | 779177  | 27397 | 629927    | 42455 | 629927    | 42455 |
| A82 Reference  | 777652  | 640546    | 439345    | 779179  | 27399 | 629929    | 42457 | 629929    | 42457 |
| A83 Reference  | 777654  | 640548    | 439347    | 779181  | 27401 | 629931    | 42459 | 629931    | 42459 |
| A84 Reference  | 777656  | 640550    | 439349    | 779183  | 27403 | 629933    | 42461 | 629933    | 42461 |
| A85 Reference  | 777658  | 640552    | 439351    | 779185  | 27405 | 629935    | 42463 | 629935    | 42463 |
| A86 Reference  | 777660  | 640554    | 439353    | 779187  | 27407 | 629937    | 42465 | 629937    | 42465 |
| A87 Reference  | 777662  | 640556    | 439355    | 779189  | 27409 | 629939    | 42467 | 629939    | 42467 |
| A88 Reference  | 777664  | 640558    | 439357    | 779191  | 27411 | 629941    | 42469 | 629941    | 42469 |
| A89 Reference  | 777666  | 640560    | 439359    | 779193  | 27413 | 629943    | 42471 | 629943    | 42471 |
| A90 Reference  | 777668  | 640562    | 439361    | 779195  | 27415 | 629945    | 42473 | 629945    | 42473 |
| A91 Reference  | 777670  | 640564    | 439363    | 779197  | 27417 | 629947    | 42475 | 629947    | 42475 |
| A92 Reference  | 777672  | 640566    | 439365    | 779199  | 27419 | 629949    | 42477 | 629949    | 42477 |
| A93 Reference  | 777674  | 640568    | 439367    | 779201  | 27421 | 629951    | 42479 | 629951    | 42479 |
| A94 Reference  | 777676  | 640570    | 439369    | 779203  | 27423 | 629953    | 42481 | 629953    | 42481 |
| A95 Reference  | 777678  | 640572    | 439371    | 779205  | 27425 | 629955    | 42483 | 629955    | 42483 |
| A96 Reference  | 777680  | 640574    | 439373    | 779207  | 27427 | 629957    | 42485 | 629957    | 42485 |
| A97 Reference  | 777682  | 640576    | 439375    | 779209  | 27429 | 629959    | 42487 | 629959    | 42487 |
| A98 Reference  | 777684  | 640578    | 439377    | 779211  | 27431 | 629961    | 42489 | 629961    | 42489 |
| A99 Reference  | 777686  | 640580    | 439379    | 779213  | 27433 | 629963    | 42491 | 629963    | 42491 |
| A100 Reference | 777688  | 640582    | 439381    | 779215  | 27435 | 629965    | 42493 | 629965    | 42493 |
| A101 Reference | 777690  | 640584    | 439383    | 779217  | 27437 | 629967    | 42495 | 629967    | 42495 |
| A102 Reference | 777692  | 640586    | 439385    | 779219  | 27439 | 629969    | 42497 | 629969    | 42497 |
| A103 Reference | 777694  | 640588    | 439387    | 779221  | 27441 | 629971    | 42499 | 629971    | 42499 |
| A104 Reference | 777696  | 640590    | 439389    | 779223  | 27443 | 629973    | 42501 | 629973    | 42501 |
| A105 Reference | 777698  | 640592    | 439391    | 779225  | 27445 | 629975    | 42503 | 629975    | 42503 |
| A106 Reference | 777700  | 640594    | 439393    | 779227  | 27447 | 629977    | 42505 | 629977    | 42505 |
| A107 Reference | 777702  | 640596    | 439395    | 779229  | 27449 | 629979    | 42507 | 629979    | 42507 |
| A108 Reference | 777704  | 640598    | 439397    | 779231  | 27451 | 629981    | 42509 | 629981    | 42509 |
| A109 Reference | 777706  | 640600    | 439399    | 779233  | 27453 | 629983    | 42511 | 629983    | 42511 |
| A110 Reference | 777708  | 640602    | 439401    | 779235  | 27455 | 629985    | 42513 | 629985    | 42513 |
| A111 Reference | 777710  | 640604    | 439403    | 779237  | 27457 | 629987    | 42515 | 629987    | 42515 |
| A112 Reference | 777712  |           |           |         |       |           |       |           |       |

**table S6. Primer sequences used.**

| Primer Name                       | Sequence                   |
|-----------------------------------|----------------------------|
| IL-32 enhancer amplicon 1 forward | ACATGGTGAAATCCCGTCCC       |
| IL-32 enhancer amplicon 1 reverse | CCCTAAAACCACTAGCTGAGCA     |
| IL-32 enhancer amplicon 2 forward | TGAGAATCTCGTGAGGCTGG       |
| IL-32 enhancer amplicon 2 reverse | ACTTCTACCAAACCTGTCC        |
| Total IL-32 forward               | AGGACGTGGACAGGTGATGTC      |
| Total IL-32 reverse               | GTCTCCAGGTAGCCCTCTTTGA     |
| Cyclophilin A (CypA/PPIA) forward | TCATCTGCACTGCCAAGACTG      |
| Cyclophilin A (CypA/PPIA) reverse | CATGCCTTCTTTCACITTTGCC     |
| β2-microglobulin (B2M)-fw         | ATGAGTATGCCTGCCGTGTG       |
| β2-microglobulin (B2M)-rev        | CCAAATGCGGCATCTTCAAAC      |
| 3C primer A                       | CCTCTATGTGTTCTCTGGGTCG     |
| 3C primer rs4349147               | GCAGGATAGAAGGTGAGAGATGAAT  |
| 3C primer B                       | GGGAACCTGACCTCAGACAG       |
| 3C primer C                       | GCACCCCTGTTGTTTCTCA        |
| 3C primer IL32 promoter           | GAGGGAAAGTCCAGACTCGG       |
| 3C primer D                       | TCAGCCAAGCTCAGACAGC        |
| 3C primer E                       | GTGGCTTCCTTCTGTCTCCC       |
| IL4R forward                      | CGTGGTCAGTGGGATAACTA       |
| IL4R reverse                      | TGGTGTGAACTGTACAGTTTC      |
| TNFRSF14 forward                  | GTGCAGTCCAGGTTATCGTGT      |
| TNFRSF14 reverse                  | CACTTGCTTAGGCCATTGAGG      |
| STAT5A forward                    | CGACGGGACCTTCTTGTG         |
| STAT5A reverse                    | GTTCCGGGGAGTCAAACCTCC      |
| LGALS1 forward                    | TCGCCAGCAACCTGAATCTC       |
| LGALS1 reverse                    | GCACGAAGCTCTTAGCGTCA       |
| ANXA1 forward                     | GCAGGCCTGGTTTATTGAAA       |
| ANXA1 reverse                     | GCTGTGCATTGTTTCGCTTA       |
| IL-32 enhancer gRNA 1 forward     | ACCGGAAAAGAAAGTTGGGGCCG    |
| IL-32 enhancer gRNA 1 reverse     | ACCGCCAGCCTGCCGTTACGAG     |
| IL-32 enhancer gRNA 2 forward     | AAACCGGCCCCCACTTTCTTTTC    |
| IL-32 enhancer gRNA 2 reverse     | AAACCTGCTGAACGGCAGGCTGGC   |
| IL-32 promoter forward            | GTGGAGCTGGGTCACTCAG        |
| IL-32 promoter reverse            | CATGGCGGCCAAAAGTTCAA       |
| rs12447486 forward                | AGATCTGGCTGGATCCTGGT       |
| rs12447486 reverse                | TACTCATGCCTGCCTTCTGC       |
| rs4349147 forward                 | CCTGGGGCAAGGATGATAGG       |
| rs4349147 reverse                 | AGACCCAGCCTCACGAGATT       |
| Oca2 promoter forward             | TAAACCTCCCTGCCTGTT         |
| Oca2 promoter reverse             | CCCTCTGAGTTCTTACTTCG       |
| Mock sgRNA 1 forward              | ACCGGTCAAGGTGCACTCAATCGC   |
| Mock sgRNA 1 reverse              | AAACGCGATTGAGTGACCTTGAC    |
| Mock sgRNA 2 forward              | ACCGCTATCATCATCAGGGGCCG    |
| Mock sgRNA 2 reverse              | AAACCGGCCCTGATGATGATAGC    |
| Amer1 forward                     | AGTACCCGTGAACAAACAGCA      |
| Amer1 reverse                     | AGGCAGAGTACAGATACCCCTTC    |
| CXXC4 forward                     | ATGCACCACCGAAACGACTC       |
| CXXC4 reverse                     | GCAGTGTTCAGGGGATAAGGT      |
| TNIK forward                      | TAAGGGTCGTCATGTCAAACG      |
| TNIK reverse                      | CCATGCCTGGTGGGTTCTTT       |
| IL-32 non-alpha forward           | TCTTCA TGCCCTCTTTCCAGTCCTA |
| IL-32 non-alpha reverse           | AAGGTGGTGTGAGTATCTTCATTTG  |
| IL-32 alpha forward               | CTTTTGGCCGCCATGTG          |
| IL-32 alpha reverse               | GTGCATTCGGGCCTTCAG         |
| IL-32 beta forward                | GAAGACTGCGTGCAGAAGGT       |
| IL-32 beta reverse                | CTTTCTATGGCCTGGTGCAT       |
| IL-32 gamma forward               | AGGCCGAATGGTAAATGCT        |
| IL-32 gamma reverse               | CTGTCTCAGGTAGCCCTCT        |
